# Supplementary material for: Description and evaluation of the JULES-ES set-up for ISIMIP2b
Source: Copernicus journal article supplement (doi:10.5194/gmd-16-4249-2023), 2023-07-27
Supplement: Supplementary file 1 [file gmd-16-4249-2023-supplement.pdf]

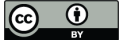

*Supplement of*

## **Description and evaluation of the JULES-ES set-up for ISIMIP2b**

**Camilla Mathison et al.**

*Correspondence to:* Andrew J. Hartley ([andrew.hartley@metoffice.gov.uk](mailto:andrew.hartley@metoffice.gov.uk))

The copyright of individual parts of the supplement might differ from the article licence.

## Introduction

The following supporting information provides additional detail on the following:

- Post-processing steps involved in formatting the JULES raw output into the files available for download at <https://data.isimip.org/search/query/jules-es-55/> (Text S1)
- ISIMIP driving data used in this study (Figure S1 and S2)
- iLAMB approach to model assessment (Text S2; Tables S1 to S6)
- More detailed evaluation of the simulations, including seasonal variation in surface fluxes (Figures S3 and S4), modelled vegetation with fire on (Figure S5) and comparison of hydrological impacts with fire on and off (Figure S6)

## S1 Converting data to ISIMIP Protocols

Code is available and is used here to post-process the raw JULES output data to ensure that it conforms to the ISIMIP protocols. Its main functions are to:

- Modify units
- Define special variables, for example those that need to be calculated from others e.g., Net Biome Production (NBP).

We also use the ISIMIP quality control python code available from github (<https://github.com/ISI-MIP/isimip-qc>). It checks the filenames against the protocol schemas and patterns. This code also checks variables, dimensions and global attributes ensuring consistency across all submitted data.

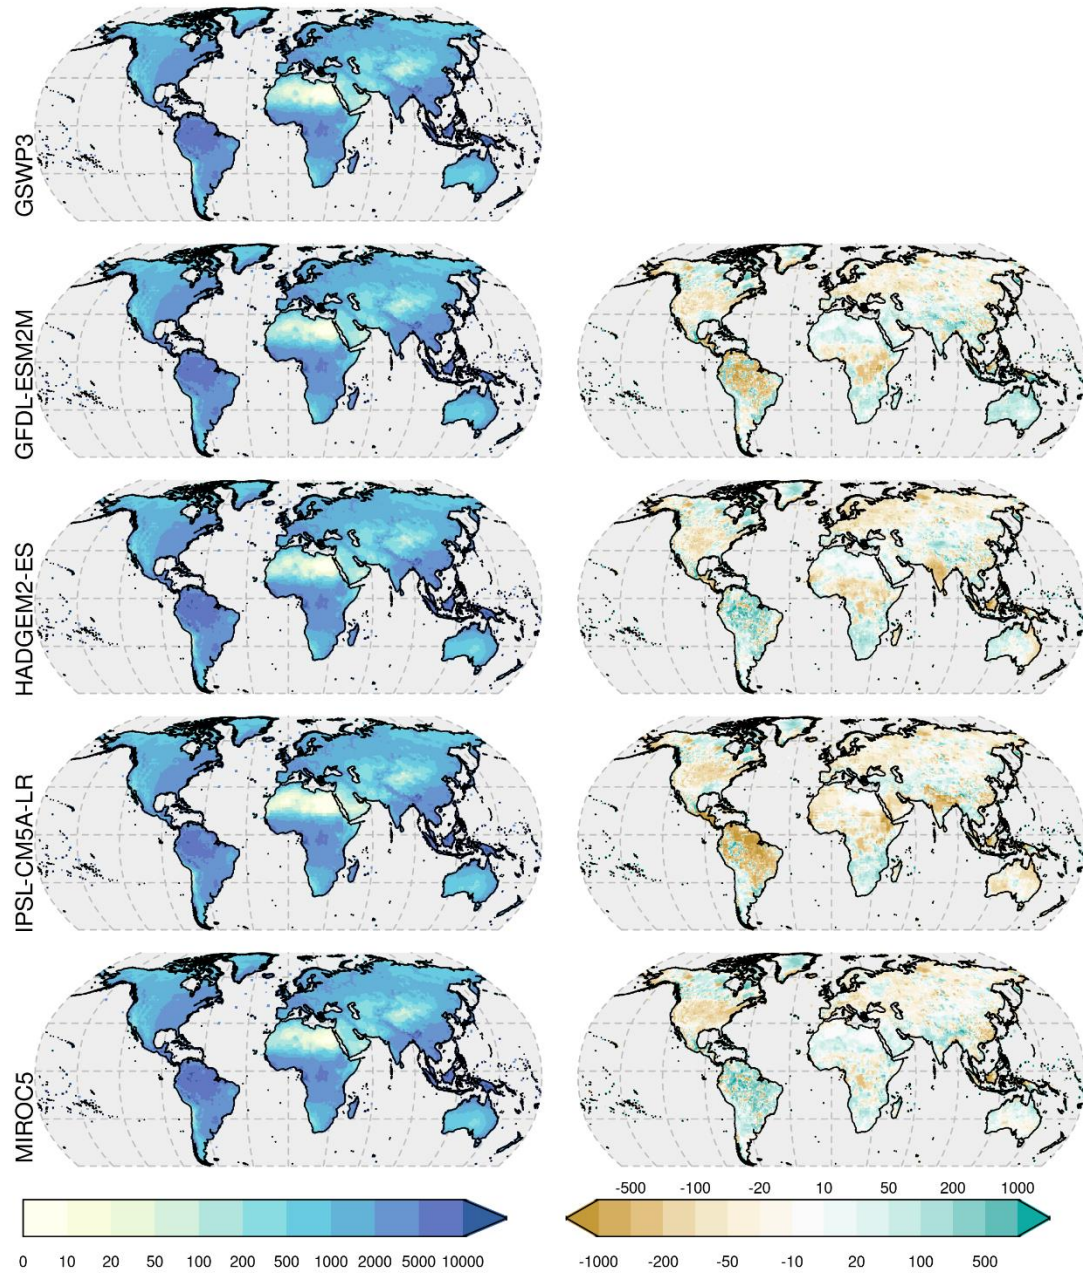

**Figure S1:** Annual average precipitation in  $\text{m} / \text{m}^2$  for 1979-2006 for (top to bottom) GSWP3 observations and each driving dataset. (right) the difference between driving data and observations.

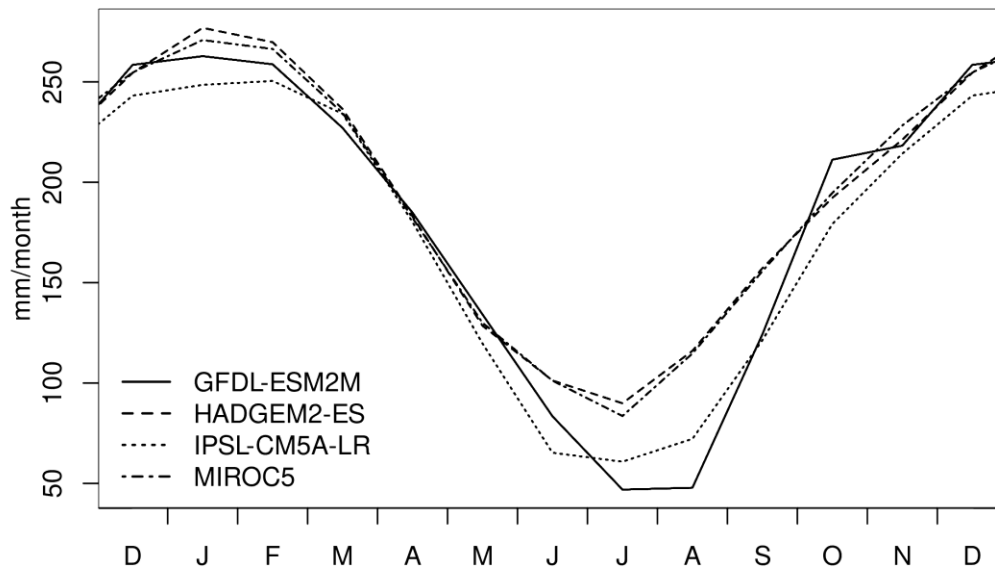

**Figure S2:** Climatological averaged precipitation over the Amazon basin, mm per month (see Figure 1 and 2) between 1979-2003.

## S2 ILAMB

Evaluation of JULES using the International Land Model Benchmarking system (ILAMB; Collier et al. (2018)). For each model–observation comparison a series of error metrics are calculated, scores are then calculated as an exponential function of each error metric, scores increase from 0 to 1 with improvements in model performance. Metrics and scores for GPP, ET and Albedo are evaluated on a latitude-longitude grid and global mean scores are shown in tables S1, S4 and S5. The runoff metrics and scores are calculated for 50 major river basins and the global mean score is weighted by the area of the basin (Table S6). To calculate the bias score, bias is normalized by observed temporal variability before an exponential function is used to map the normalized bias to fit between 0 and 1. For some variables, including GPP and ET the global mean bias score is weighted by the absolute value of the observation in order to down-weight regions of low GPP or ET. Spatial distributions scores are based on a combination of the spatial correlation and spatial standard deviation of time-mean model data. Seasonal cycle scores are based on the error in the timing of the seasonal maximum. For vegetation cover, we used the Manhattan Metric (MM; Table S2) from Kelley et al. (2013), which is the area weighted mean of grid-cell summed absolute difference between different fractional items. We compared tree vs none-tree (which includes all other vegetation items and bare soil), shrub vs none-shrub, wood (tree and shrub) vs none-wood and grass vs none-grass. Each comparison excludes water bodies, ice and urban areas, with vegetation and soil rescaled to add up to 1, and area weighting adjusted accordingly.

|                       | Global average NBP(PgC/yr) | Global average GPP (PgC/yr) | Bias (g m <sup>-2</sup> d <sup>-1</sup> ) | Bias Score | Seasonal Cycle Score | Spatial Distribution Score |
|-----------------------|----------------------------|-----------------------------|-------------------------------------------|------------|----------------------|----------------------------|
| <b>Observed</b>       | 1.0-2.8                    | 120-140                     |                                           |            |                      |                            |
| <b>GFDL</b>           | 0.93                       | 135                         | 0.39                                      | 0.49       | 0.75                 | 0.95                       |
| <b>HadGEM2</b>        | 1.37                       | 137                         | 0.45                                      | 0.48       | 0.78                 | 0.93                       |
| <b>IPSL</b>           | 1.25                       | 134                         | 0.37                                      | 0.47       | 0.76                 | 0.94                       |
| <b>MIROC</b>          | 1.46                       | 137                         | 0.45                                      | 0.47       | 0.77                 | 0.93                       |
| <b>GFDL + fire</b>    | 0.66                       | 133                         | 0.34                                      | 0.48       | 0.74                 | 0.94                       |
| <b>HadGEM2 + fire</b> | 1.16                       | 135                         | 0.40                                      | 0.45       | 0.78                 | 0.91                       |
| <b>IPSL + fire</b>    | 0.87                       | 132                         | 0.32                                      | 0.45       | 0.75                 | 0.92                       |
| <b>MIROC + fire</b>   | 1.34                       | 135                         | 0.40                                      | 0.45       | 0.76                 | 0.91                       |

**Table S1:** benchmark results for NBP and GPP versus Jung et al. (2011) upscaled Fluxnet GPP observation. Observed global total for GPP and NBP are from Global Carbon Budget (Friedlingstein et al., 2020). Cells shaded in global NBP and GPP columns to indicate where the simulation is within the range of the Global Carbon Budget.

|                                   | Tree                           |      | Shrub                          |      | Woody total                    |      | Grass                          |      |
|-----------------------------------|--------------------------------|------|--------------------------------|------|--------------------------------|------|--------------------------------|------|
|                                   | Bias (Mkm <sup>2</sup> )<br>MM |      | Bias (Mkm <sup>2</sup> )<br>MM |      | Bias (Mkm <sup>2</sup> )<br>MM |      | Bias (Mkm <sup>2</sup> )<br>MM |      |
| <b>Observation (Global total)</b> | 34.86                          |      | 5.02                           |      | 39.88                          |      | 36.87                          |      |
| <b>GFDL</b>                       | 5.31                           | 0.24 | 1.28                           | 0.12 | 6.59                           | 0.44 | -8.91                          | 0.38 |
| <b>HadGEM2</b>                    | 5.08                           | 0.24 | 1.31                           | 0.12 | 6.39                           | 0.44 | -9.96                          | 0.38 |
| <b>IPSL</b>                       | 4.97                           | 0.24 | 1.22                           | 0.12 | 6.19                           | 0.43 | -9.66                          | 0.38 |
| <b>MIROC</b>                      | 5.31                           | 0.24 | 1.22                           | 0.12 | 6.53                           | 0.44 | -11.47                         | 0.38 |
| <b>GFDL + fire</b>                | -0.49                          | 0.27 | -4.09                          | 0.08 | -3.60                          | 0.30 | -9.5                           | 0.42 |
| <b>HadGEM2 + fire</b>             | 1.55                           | 0.26 | -4.34                          | 0.08 | -2.79                          | 0.32 | -10.98                         | 0.41 |
| <b>IPSL + fire</b>                | 1.05                           | 0.26 | -4.41                          | 0.08 | -3.36                          | 0.31 | -10.69                         | 0.41 |
| <b>MIROC + fire</b>               | 1.86                           | 0.26 | -4.11                          | 0.08 | -2.25                          | 0.33 | -12.99                         | 0.42 |

**Table S2:** benchmark results for vegetation fraction observations ESACCI Land cover v2.0.7 (Harper et al., 2022). Shades as per Table S1.

|                       | Global total (Mkm <sup>2</sup> ) | Bias (monthly %) | Bias Score | Seasonal Cycle Score | Spatial Distribution Score |
|-----------------------|----------------------------------|------------------|------------|----------------------|----------------------------|
| <b>Observation</b>    | 4.55                             | 0.346            |            |                      |                            |
| <b>GFDL + fire</b>    | 4.43                             | -0.0431          | 0.74       | 0.83                 | 0.74                       |
| <b>HadGEM2 + fire</b> | 4.13                             | -0.0655          | 0.74       | 0.83                 | 0.74                       |
| <b>IPSL + fire</b>    | 4.33                             | -0.0479          | 0.75       | 0.84                 | 0.76                       |
| <b>MIROC + fire</b>   | 3.94                             | -0.0657          | 0.74       | 0.83                 | 0.73                       |

**Table S3:** benchmark results for burnt area versus GFED4s observations (Van Der Werf et al., 2017).

|                       | Bias<br>(mm d <sup>-1</sup> ) | Bias Score | Seasonal Cycle<br>Score | Spatial Distribution<br>Score |
|-----------------------|-------------------------------|------------|-------------------------|-------------------------------|
| <b>GFDL</b>           | 0.13                          | 0.62       | 0.82                    | 0.98                          |
| <b>HadGEM2</b>        | 0.17                          | 0.62       | 0.80                    | 0.97                          |
| <b>IPSL</b>           | 0.13                          | 0.62       | 0.81                    | 0.97                          |
| <b>MIROC</b>          | 0.18                          | 0.63       | 0.81                    | 0.97                          |
| <b>GFDL + fire</b>    | 0.09                          | 0.63       | 0.82                    | 0.98                          |
| <b>HadGEM2 + fire</b> | 0.14                          | 0.64       | 0.80                    | 0.97                          |
| <b>IPSL + fire</b>    | 0.10                          | 0.64       | 0.81                    | 0.98                          |
| <b>MIROC + fire</b>   | 0.15                          | 0.64       | 0.81                    | 0.97                          |

**Table S4:** benchmark results for evapotranspiration (ET) versus GLEAM V2A dataset (Miralles et al., 2011). Note that the ILAMB comparison to MODIS MOD16A2 ET (Mu et al., 2011) produces consistent results, with mean biases being positive and slightly smaller when fire is included, and the other scores being nearly identical between the simulations with and without fire. Shades as per Table S1

|                       | Bias | Bias Score | Seasonal Cycle<br>Score | Spatial Distribution<br>Score |
|-----------------------|------|------------|-------------------------|-------------------------------|
| <b>GFDL</b>           | 0.07 | 0.32       | 0.59                    | 0.97                          |
| <b>HadGEM2</b>        | 0.07 | 0.33       | 0.60                    | 0.97                          |
| <b>IPSL</b>           | 0.07 | 0.33       | 0.59                    | 0.97                          |
| <b>MIROC</b>          | 0.07 | 0.32       | 0.60                    | 0.97                          |
| <b>GFDL + fire</b>    | 0.07 | 0.33       | 0.57                    | 0.96                          |
| <b>HadGEM2 + fire</b> | 0.07 | 0.33       | 0.58                    | 0.96                          |
| <b>IPSL + fire</b>    | 0.07 | 0.33       | 0.57                    | 0.96                          |
| <b>MIROC + fire</b>   | 0.07 | 0.33       | 0.57                    | 0.96                          |

**Table S5:** benchmark results for albedo versus GEWEX SRB radiation observations (Stackhouse et al., 2011). Shades as per Table S1



|                       | Bias (mm d <sup>-1</sup> ) | Bias Score | Spatial Distribution Score |
|-----------------------|----------------------------|------------|----------------------------|
| <b>GFDL</b>           | 0.02                       | 0.80       | 0.97                       |
| <b>HadGEM2</b>        | -0.01                      | 0.80       | 0.97                       |
| <b>IPSL</b>           | -0.04                      | 0.78       | 0.94                       |
| <b>MIROC</b>          | -0.01                      | 0.80       | 0.97                       |
| <b>GFDL + fire</b>    | 0.05                       | 0.78       | 0.96                       |
| <b>HadGEM2 + fire</b> | 0.02                       | 0.79       | 0.96                       |
| <b>IPSL + fire</b>    | -0.01                      | 0.77       | 0.94                       |
| <b>MIROC + fire</b>   | 0.02                       | 0.78       | 0.96                       |

**Table S6:** benchmark results for global runoff versus Dai and Trenberth (2002) derived GRDC Aiguo Runoff Dataset. We've shaded cells where metric scores indicate whether the with or without fire runs perform better. Lighter shade indicates equal scores with and without fire.

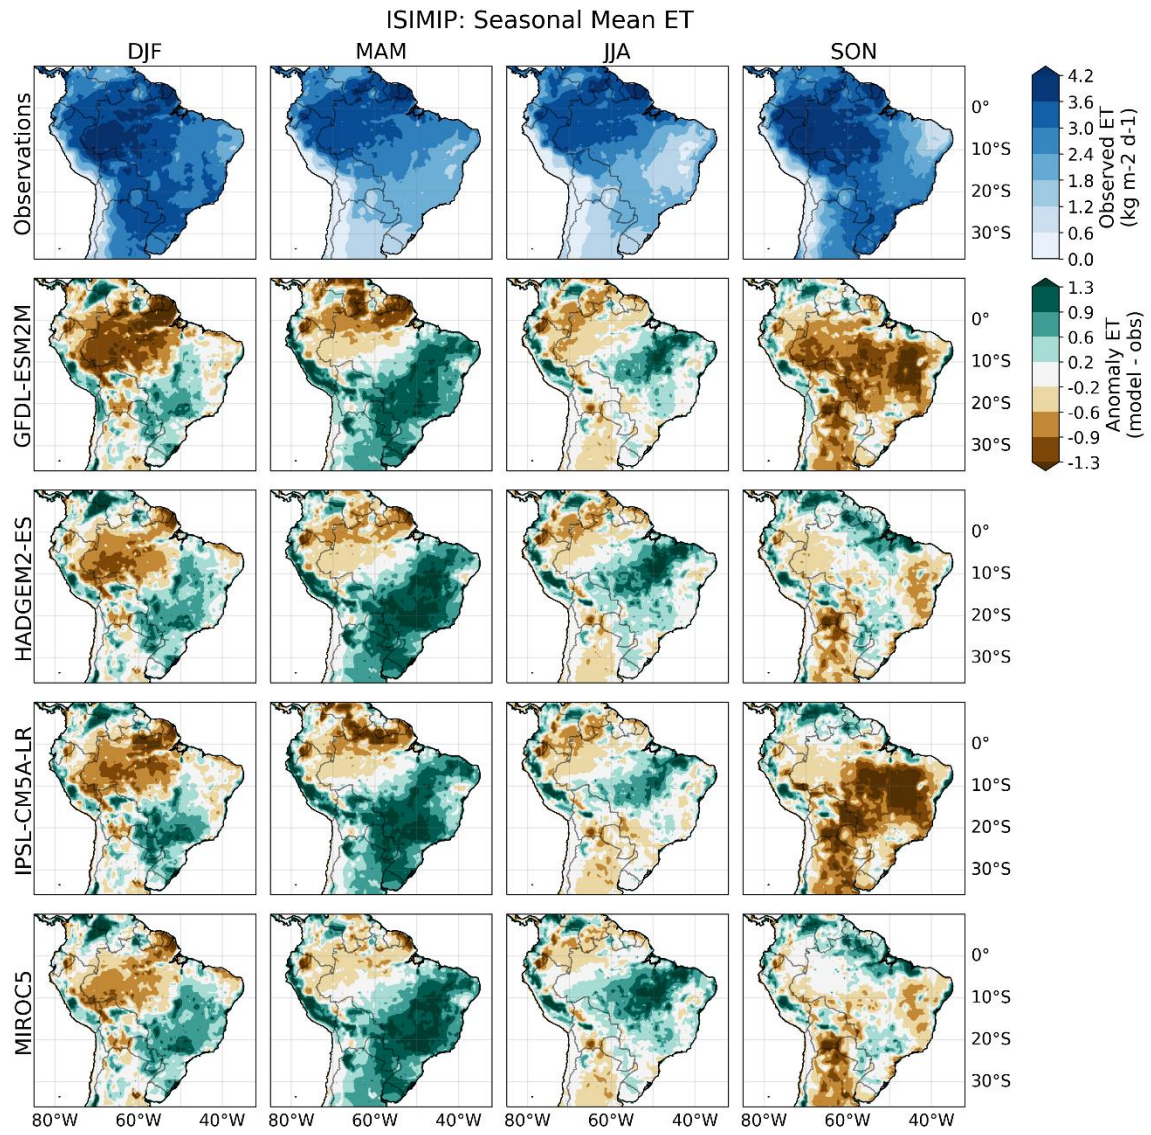

**Figure S3:** Seasonal variation in Evapotranspiration (ET) for tropical South America.

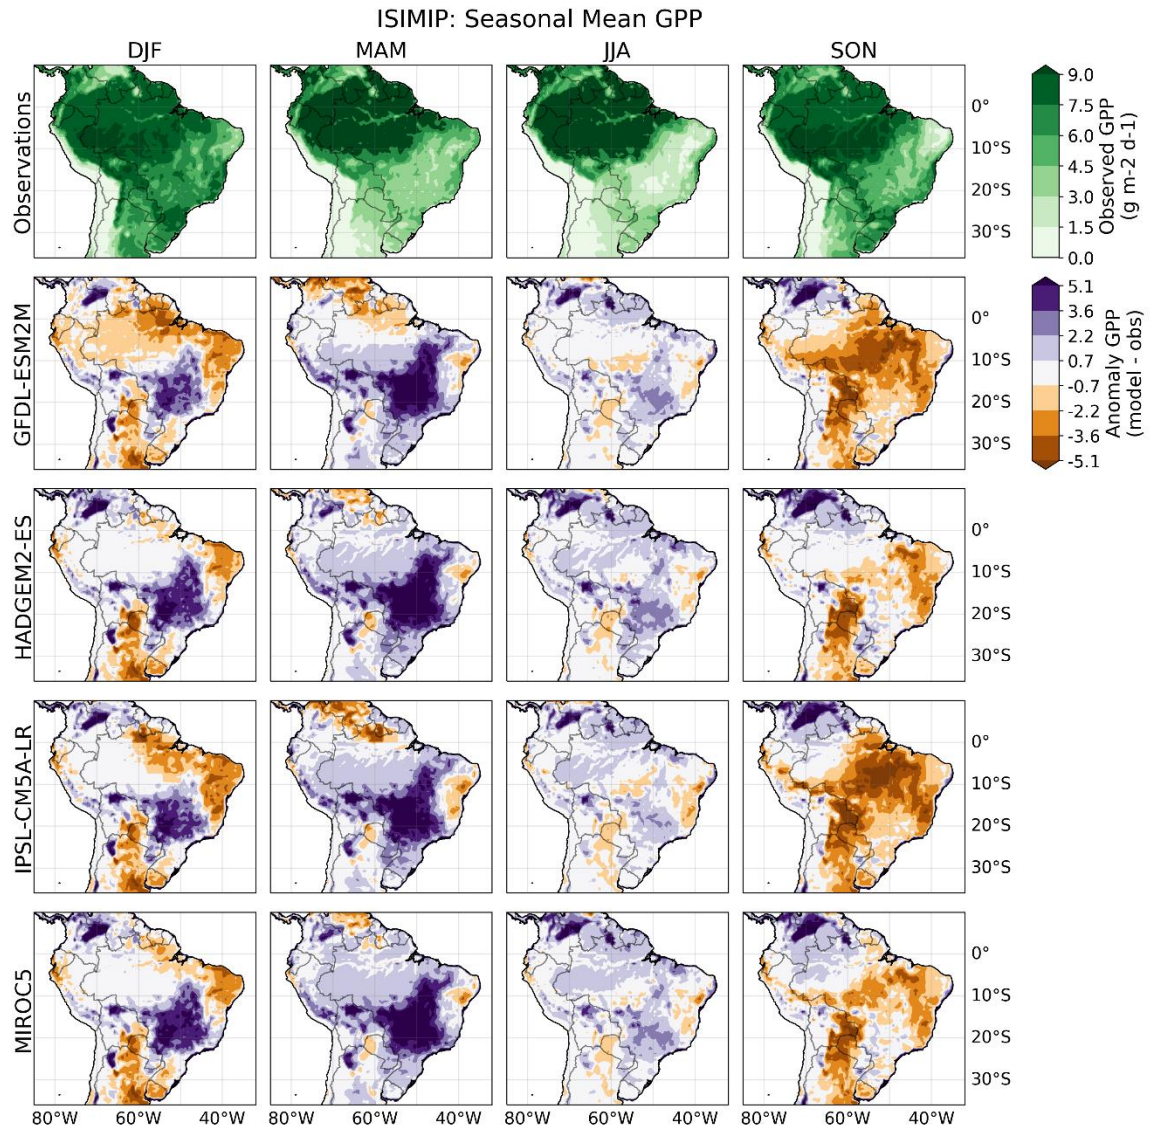

**Figure S4:** Seasonal variation in Gross Primary Production (GPP) for tropical South America



### ISIMIP: PFT Fractions (Fire On)

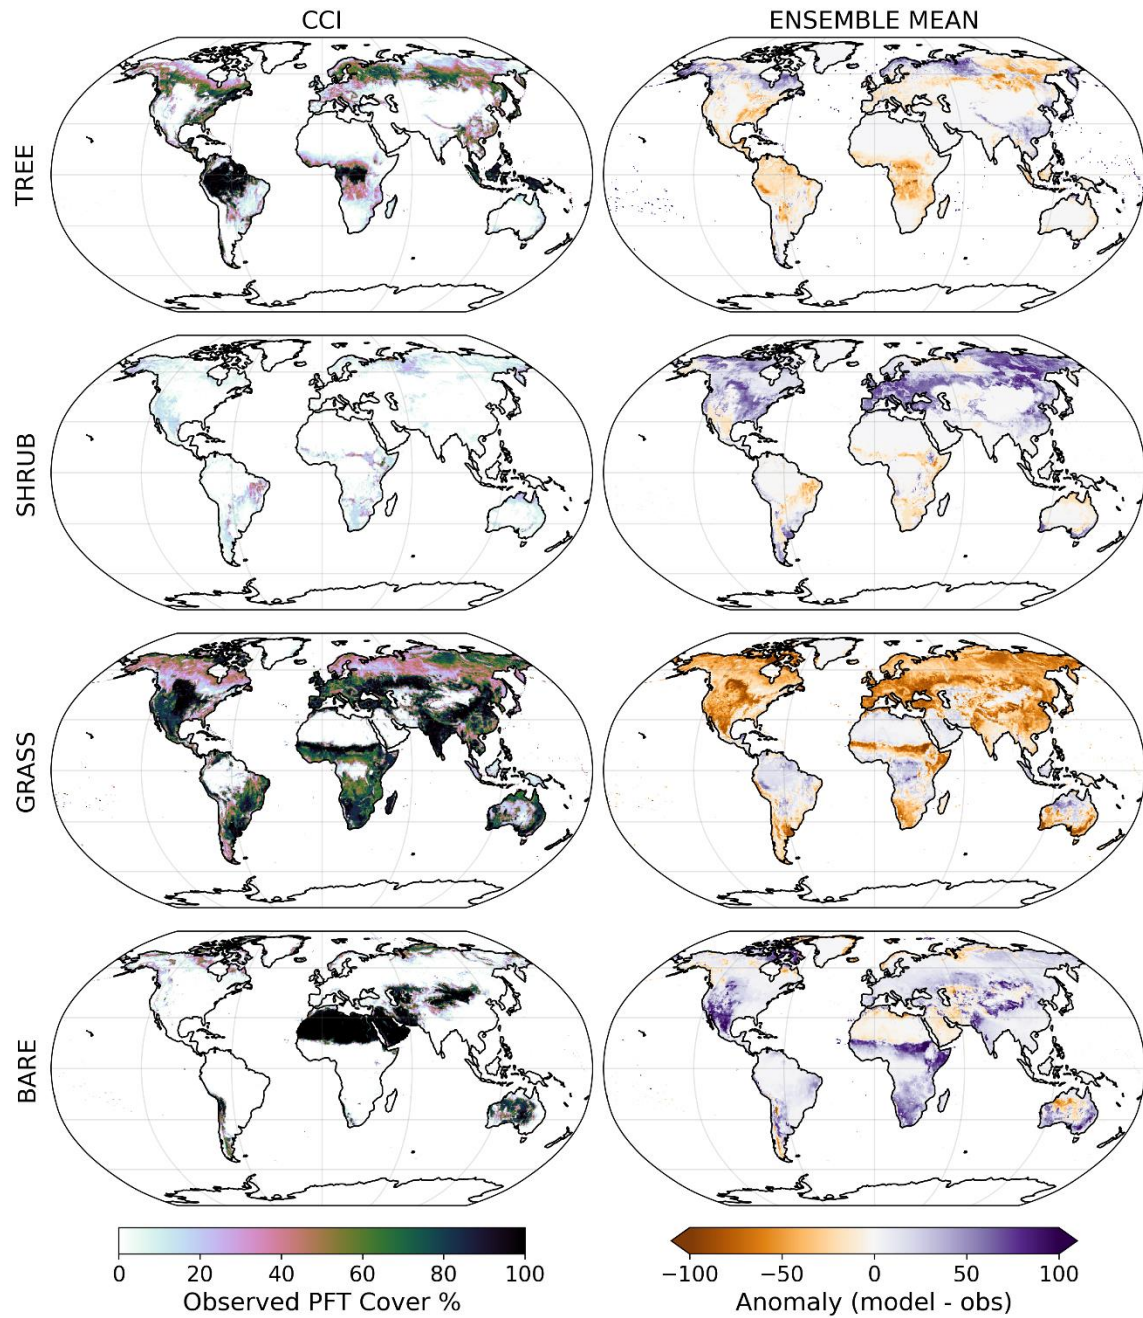

**Figure S5:** Comparison of modelled ensemble mean vegetation cover, with fire, vs observations. Split (top to bottom) by tree, shrub, grass and unvegetated (bare) fraction. (Left to right) Observations CCI\_LC v2.0.7 (Harper et al., 2022), and the difference between model ensemble mean and observations.

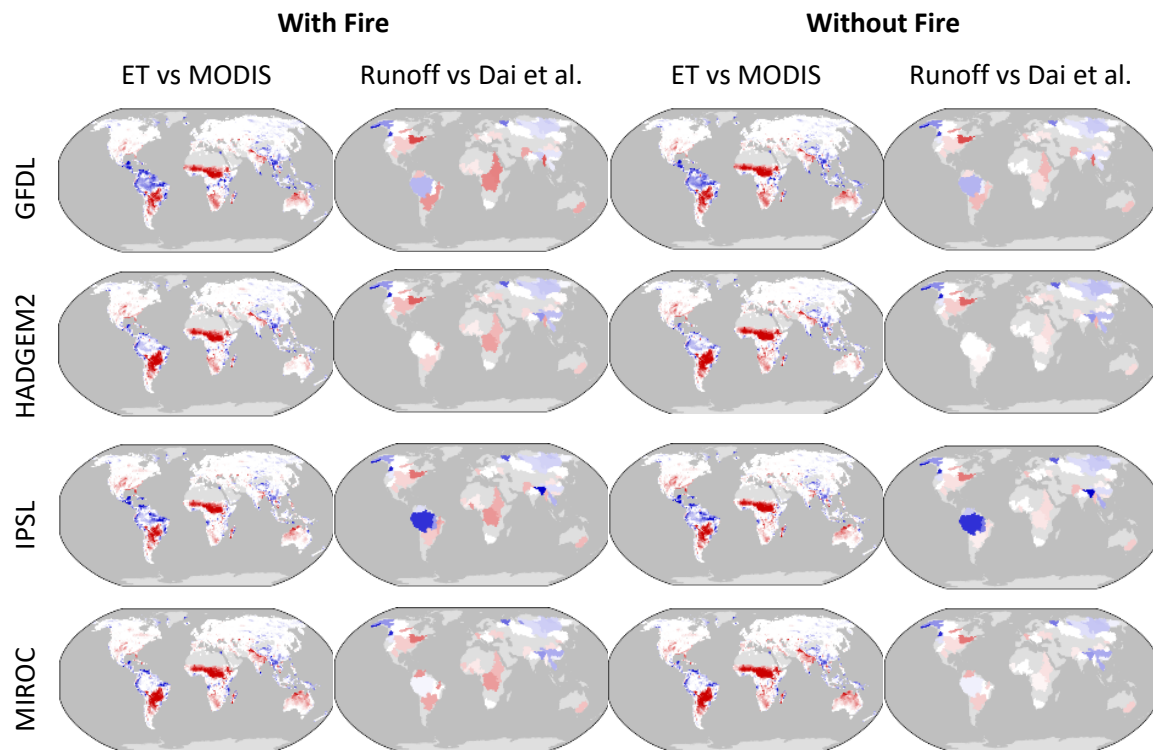

**Figure S6:** Multi-year mean bias of ET and catchment scale runoff simulated by JULES with and without fire, as driven by 4 sets of climate driving data. Modelled ET (1980–2011) is compared to GLEAM (Miralles et al., 2011). Runoff (1980–2014) is compared to Dai & Trenberth (2002). ISIMIP2b forcing data derived from 4 CMIP5 GCMs: GFDL-ESM2M; HadGEM2-ES; IPSL-CM5A-LR; MIROC5.

## References

- Collier, N., Hoffman, F. M., Lawrence, D. M., Keppel-Aleks, G., Koven, C. D., Riley, W. J., et al. (2018). The International Land Model Benchmarking (ILAMB) System: Design, Theory, and Implementation. *Journal of Advances in Modeling Earth Systems*, 10(11), 2731–2754. <https://doi.org/10.1029/2018MS001354>
- Dai, A., & Trenberth, K. E. (2002). Estimates of Freshwater Discharge from Continents: Latitudinal and Seasonal Variations. *Journal of Hydrometeorology*, 3(6), 660–687. Retrieved from [www.R-ArcticNET.sr.unh.edu](http://www.R-ArcticNET.sr.unh.edu)
- Friedlingstein, P., O’Sullivan, M., Jones, M. W., Andrew, R. M., Hauck, J., Olsen, A., et al. (2020). Global Carbon Budget 2020. *Earth System Science Data*, 12(4), 3269–3340. <https://doi.org/10.5194/ESSD-12-3269-2020>

- Harper, K. L., Lamarche, C., Hartley, A., Peylin, P., Ottlé, C., Bastrikov, V., et al. (2022). A 29-year time series of annual 300-metre resolution plant functional type maps for climate models. *Earth System Science Data Discussions*, Submitted.
- Jung, M., Reichstein, M., Margolis, H. a., Cescatti, A., Richardson, A. D., Arain, M. A., et al. (2011). Global patterns of land-atmosphere fluxes of carbon dioxide, latent heat, and sensible heat derived from eddy covariance, satellite, and meteorological observations. *Journal of Geophysical Research*, *116*, G00J07. <https://doi.org/10.1029/2010JG001566>
- Kelley, D. I., Prentice, I. C., Harrison, S. P., Wang, H., Simard, M., Fisher, J. B., & Willis, K. O. (2013). A comprehensive benchmarking system for evaluating global vegetation models. *Biogeosciences*, *10*(5), 3313–3340. <https://doi.org/10.5194/BG-10-3313-2013>
- Miralles, D. G., De Jeu, R. A. M., Gash, J. H., Holmes, T. R. H., & Dolman, A. J. (2011). Magnitude and variability of land evaporation and its components at the global scale. *Hydrology and Earth System Sciences*, *15*(3), 967–981. <https://doi.org/10.5194/HESS-15-967-2011>
- Mu, Q., Zhao, M., & Running, S. W. (2011). Improvements to a MODIS global terrestrial evapotranspiration algorithm. *Remote Sensing of Environment*, *115*(8), 1781–1800. <https://doi.org/10.1016/j.rse.2011.02.019>
- Van Der Werf, G. R., Randerson, J. T., Giglio, L., Van Leeuwen, T. T., Chen, Y., Rogers, B. M., et al. (2017). Global fire emissions estimates during 1997-2016. *Earth System Science Data*, *9*(2), 697–720. <https://doi.org/10.5194/ESSD-9-697-2017>
